# Supplementary material for: Monoamine oxidase A activity in fibroblasts as a functional confirmation of MAOA variants
Source: PubMed Central journal article supplement (PMC7932864; doi:10.1002/jmd2.12194), 2020-12-28
Supplement: JMD2-58-114-s001.pdf [file JMD2-58-114-s001.pdf]

## Supplementary material

**Table S1. Neurotransmitter analysis results of the index patient of Family 1.**

| Metabolite                   |                               | Value        | Reference range | Unit |
|------------------------------|-------------------------------|--------------|-----------------|------|
| <b>Urine</b><br><b>(24h)</b> | Serotonin                     | <b>521</b>   | <200            | µg/l |
|                              | Catecholamines                | <b>141.8</b> | <115            | µg/l |
|                              | Norepinephrine                | <b>105.9</b> | <100            | µg/l |
|                              | Epinephrine                   | <b>35.9</b>  | <20             | µg/l |
|                              | Dopamine                      | <b>644.8</b> | 65-563          | µg/l |
|                              | Metanephrine, normetanephrine | <b>2850</b>  | <900            | µg/l |
|                              | Normetanephrine               | <b>2382</b>  | <450            | µg/l |
|                              | Metanephrine                  | <b>468.2</b> | <350            | µg/l |
| <b>Serum</b>                 | Serotonin                     | <b>429</b>   | 101-283         | µg/l |

Bold-faced values are outside of the reference range.

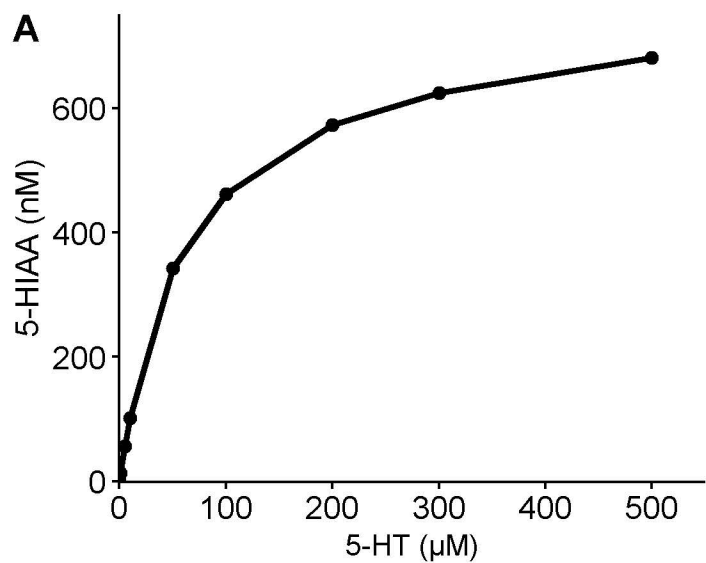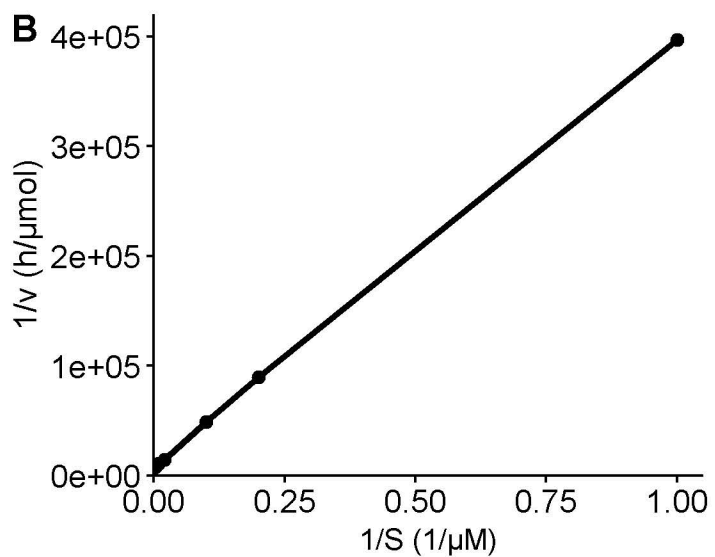

**Figure S1. Substrate curve (A) and Lineweaver-Burk plot (B) for the MAO-A assay with reaction volume 400  $\mu$ l and reaction time 2 h.**

From B, it was calculated that  $K_m = 50 \mu\text{M}$  and  $V_{\text{max}} = 1.3 \cdot 10^{-4} \mu\text{mol/h}$ . 5-HIAA = 5-hydroxyindoleacetic acid, 5-HT = 5-hydroxytryptamine, S = substrate, v = velocity.

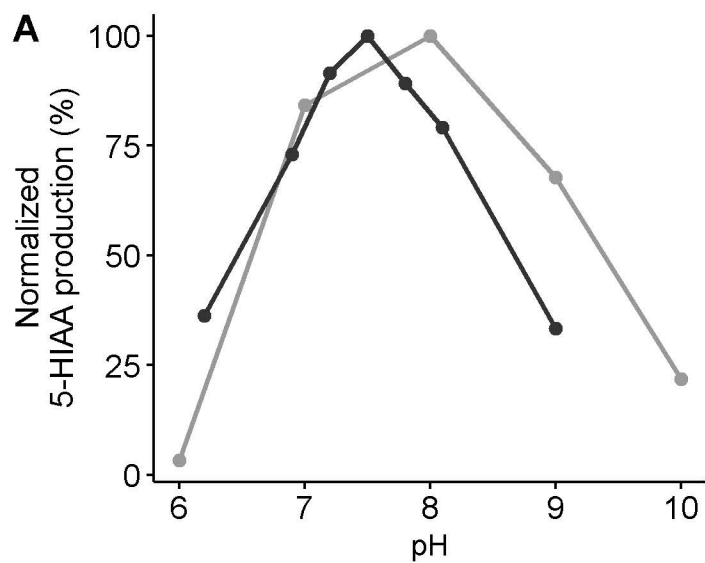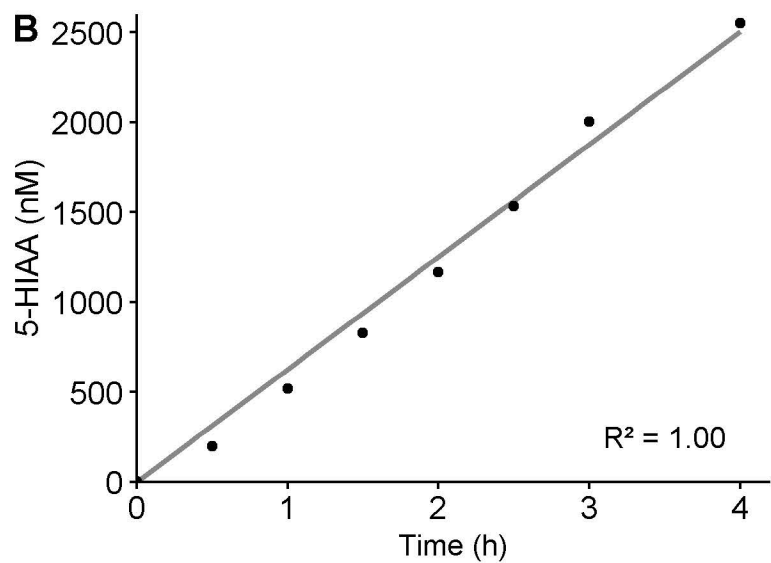

**Figure S2. (A) pH curves for determination of the optimal pH for the used MAO-A assay. (B) 5-HIAA production with reaction times ranging from 0 to 4 h.**

(A) A broad spectrum analysis of the effect of pH showed that the optimum was around 7 to 8 (first optimization), which was further tested using a narrower range with more measuring points (second optimization). Based on this, the optimal pH for the assay was determined to be 7.5. (B) The trendline and  $R^2$  were calculated by linear regression with (0,0) as a set point.
